# Supplementary material for: LeGRXS14 Reduces Salt Stress Tolerance in Arabidopsis thaliana
Source: MDPI journal article supplement (doi:10.3390/plants12122320), 2023-06-15
Supplement: s1 [file s1]

**Table S1.** Gene ID used in this paper.

| <b>Name</b> | <b>Gene ID</b>       |
|-------------|----------------------|
| LeGRXS14    | Solyc02g082200       |
| AtGRXS14    | AT3G54900            |
| BnGRXS14    | CDX78278             |
| CaGRXS14    | PHT90856             |
| ClGRXS14    | Cla97C11G217130      |
| CsGRXS14    | KGN61246             |
| GmGRXS14    | KRH00894             |
| OsGRXS14    | Os03t0851200         |
| ZmGRXS14    | Zm00001eb064590_P001 |
| LeGRXS15    | Solyc06g067960       |
| AtGRXS15    | AT3G15660            |
| BnGRXS15    | CDX97692             |
| CaGRXS15    | PHT79445             |
| ClGRXS15    | Cla97C10G193120      |
| CsGRXS15    | KGN52871             |
| GmGRXS15    | KRH44417             |
| OsGRXS15    | Os01t0530400         |
| ZmGRXS15    | Zm00001eb336840_P002 |
| LeGRXS16    | Solyc09g005620       |
| AtGRXS16    | AT2G38270            |
| BnGRXS16    | CDY14473             |
| CaGRXS16    | PHT72767             |
| ClGRXS16    | Cla97C10G205580      |
| CsGRXS16    | KGN58741             |
| GmGRXS16    | KRH65709             |
| OsGRXS16    | Os12t0175500         |
| ZmGRXS16    | Zm00001eb163210_P001 |
| LeGRXS17    | Solyc02g078360       |
| AtGRXS17    | AT4G04950            |
| BnGRXS17    | CDX90882             |
| CaGRXS17    | PHT90520             |
| ClGRXS17    | Cla97C01G022820      |
| CsGRXS17    | KGN49222             |
| GmGRXS17    | KRH20463             |
| OsGRXS17    | Os10t0500700         |
| ZmGRXS17    | Zm00001eb044380      |

**Table S2.** Primers used in this paper.

| <b>Name</b>      | <b>Sequence, 5' to 3'</b> |
|------------------|---------------------------|
| LeActin-Forword  | TCGTAAGGAGTGCCCTAATGCTGA  |
| LeActin-Reverse  | CAATCGCCTCCAGCCTTGTGTAA   |
| AtActin-Forword  | AACTCTATGCAGCATTTGATCCACT |
| AtActin-Reverse  | TGATTGCATATCTTTATCGCCATC  |
| LeGRXS14-Forword | GCCAACCTTTCCACAACCTCTAC   |
| LeGRXS14-Reverse | CTCTCCGCTCTTGTATGCTTC     |
| AtZAT12-Forword  | AACACAAACCACAAGAGGATCA    |
| AtZAT12-Reverse  | AAGCATCAAACAATTCGCCG      |
| AtSOS1-Forword   | CTTCTTCCTCTGTGTTGTTC      |
| AtSOS1-Reverse   | GAAGACGAATCGGTTCGCTT      |
| AtSOS2-Forword   | AAGCTATGTTGAACTGGAAAAC    |
| AtSOS2-Reverse   | TGGATTTAAGTTGGGATCAAAACG  |
| AtSOS3-Forword   | AGAAGGGTGTGTTGTATGGG      |
| AtSOS3-Reverse   | GAAGCTCGGGATCCTCATATC     |
| AtTPC1-Forword   | GCTCTATTGGCGTACAGGTCTTTG  |
| AtTPC1-Reverse   | GAAGAGTGTGACCATTCCATTGG   |
| AtRbOHD-Forword  | CCTATGAGCCGATGGAAAAA      |
| AtRbOHD-Reverse  | ACAATGCCAGTCCATCCTTC      |
| AtHKT1-Forword   | TTCATTCTGTCTCTGCCATC      |
| AtHKT1-Reverse   | AGGAAGATAAGTTGGGTGTTGG    |
| AtNHX1-Forword   | TTGTATTCCGAGAGGGTGTTC     |
| AtNHX1-Reverse   | GCTTCGTGGTTTAGGTGAGTG     |
| AtNHX2-Forword   | CGCCTTGAGTGGTATCCTAAC     |
| AtNHX2-Reverse   | GAGAAACGACAAAGTAGCAAAGG   |
| AtNHX5-Forword   | CTTTTGCTGGCTCAATGTCTG     |
| AtNHX5-Reverse   | GTTCTGAAGATTCTCGGTGTCC    |
| AtNHX6-Forword   | TTAGGTGATGGATTTGAGGTGG    |
| AtNHX6-Reverse   | CCGCACTCTTATGGAACCTCTC    |

\* All primers were designed at Integrated DNA Technologies (idtdna.com)

Table S3. Lengths and preserved sequences of motifs in GRXS14.

| No.     | Motif Logo                                                                         | Sequence                                                   | Length |
|---------|------------------------------------------------------------------------------------|------------------------------------------------------------|--------|
| Motif 1 |  | PFETINILENEALRQGLK<br>EYSSWPTFPQLYIDGEFF<br>GGCDITVEAYKSGE | 50     |
| Motif 2 |  | CLSALSPZLKATLDKVV<br>TSZKVVLFMKGTKDFPQ<br>CGFSHTVVQILKSLNV | 50     |
| Motif 3 |   | LQELLEKAMCS                                                | 11     |
| Motif 4 |   | SSSFTNKPLSLRFLPK<br>PTSLQVHSH                              | 26     |
| Motif 5 |   | NRNLQHFDPI                                                 | 10     |
| Motif 6 |   | KSGRNF                                                     | 6      |

\* All motifs were founded at MEME - MEME Suite (meme-suite.org)

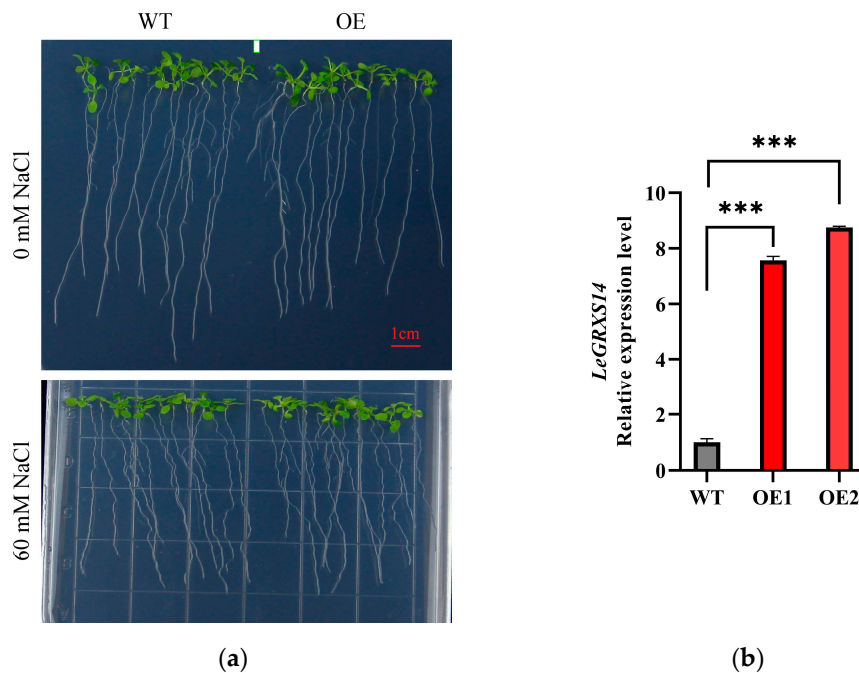

**Figure S1.** Phenotypic analyses of OE and WT in response to Salt stress. (a) WT and OE were grown for 12 days on the  $\frac{1}{2}$  MS with or without 60 mM NaCl; (b) Statistic analysis of *LeGRXS14* expression in WT and OE, WT was showed with gray, OE was showed with red, the data in the figure are mean  $\pm$  SD, ( $n = 3$ ); \*\*\*  $p < 0.001$ .

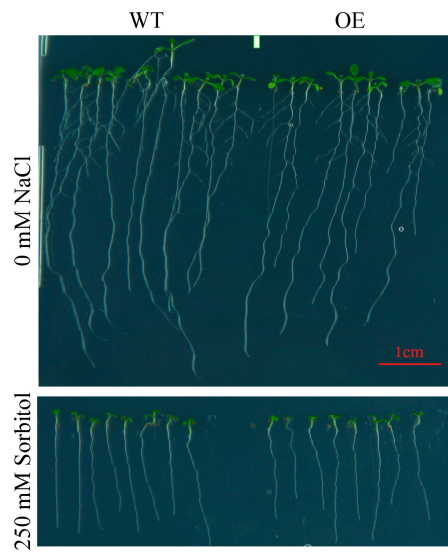

(a)

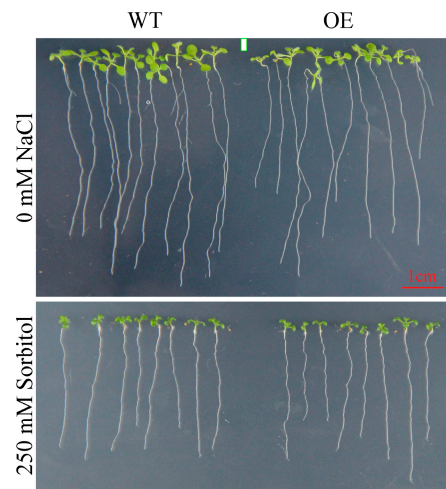

(b)

**Figure S2.** Phenotypic analyses of OE and WT in response to osmotic stress. (a) WT and OE were grown for 12 days on the  $\frac{1}{2}$  MS with or without 250 mM sorbitol (0.2 mM  $\text{Ca}^{2+}$ ); (b) WT and OE were grown for 8 days on the  $\frac{1}{2}$  MS with or without 250 mM sorbitol.

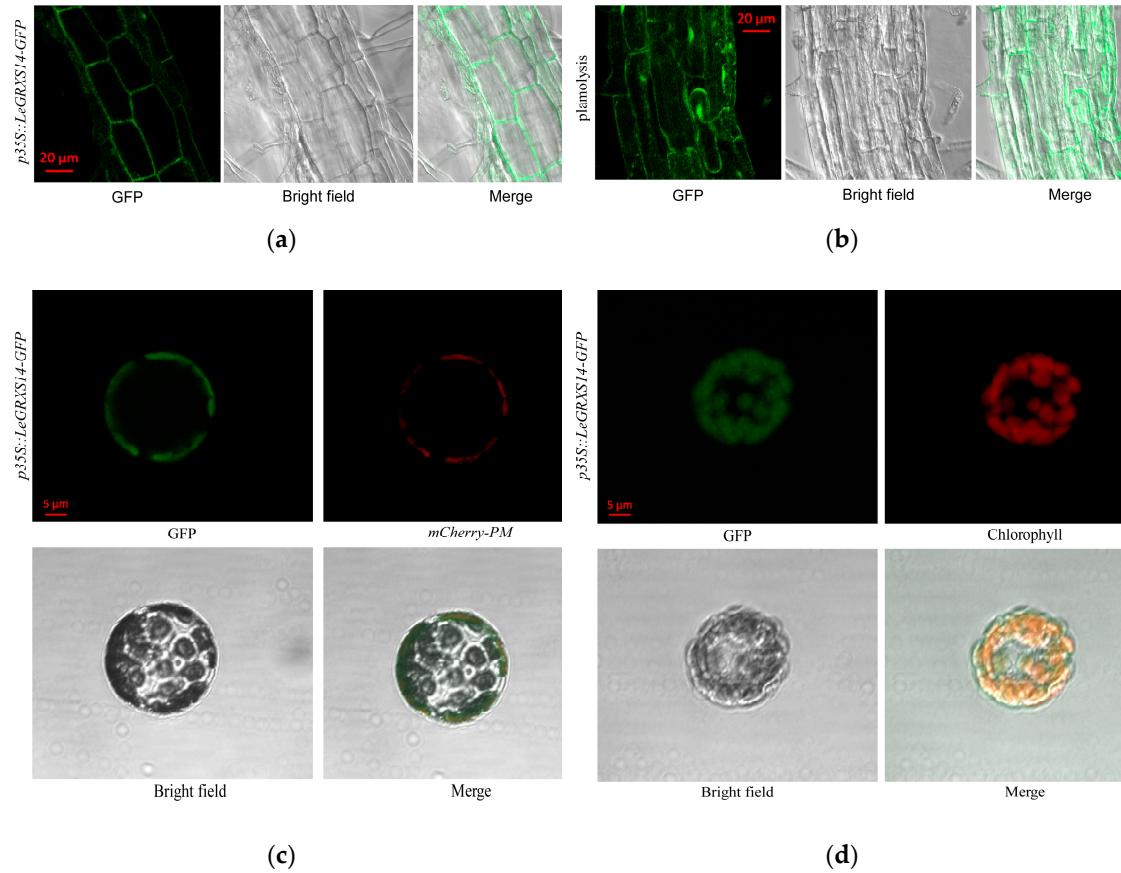

**Figure S3.** Subcellular localization of LeGRXS14 proteins: **(a)** Confocal micrograph of turgid periphery cells from the roots of the *p35S::LeGRXS14-GFP* construct. **(b)** Confocal micrograph of plasmolyzed cells from the roots of the *p35S::LeGRXS14-GFP* construct. Bars = 20 μm. **(c)** Subcellular localization of LeGRXS14-GFP and mCherry-plasma membrane in tobacco protoplasts. **(d)** Subcellular localization of LeGRXS14-GFP and Chlorophyll autofluorescence in transgenic *A. thaliana* leaf protoplasts containing *p35S::LeGRXS14-GFP*. Green shows GFP signals, red shows mCherry or Chlorophyll autofluorescence signals. Bars = 5 μm.
